# Supplementary material for: The Protective Effects of Influenza Vaccination in Elderly Patients with Breast Cancer in Taiwan: A Real-World Evidence-Based Study
Source: MDPI journal article supplement (doi:10.3390/vaccines10071144), 2022-07-19
Supplement: s1 [file s1]

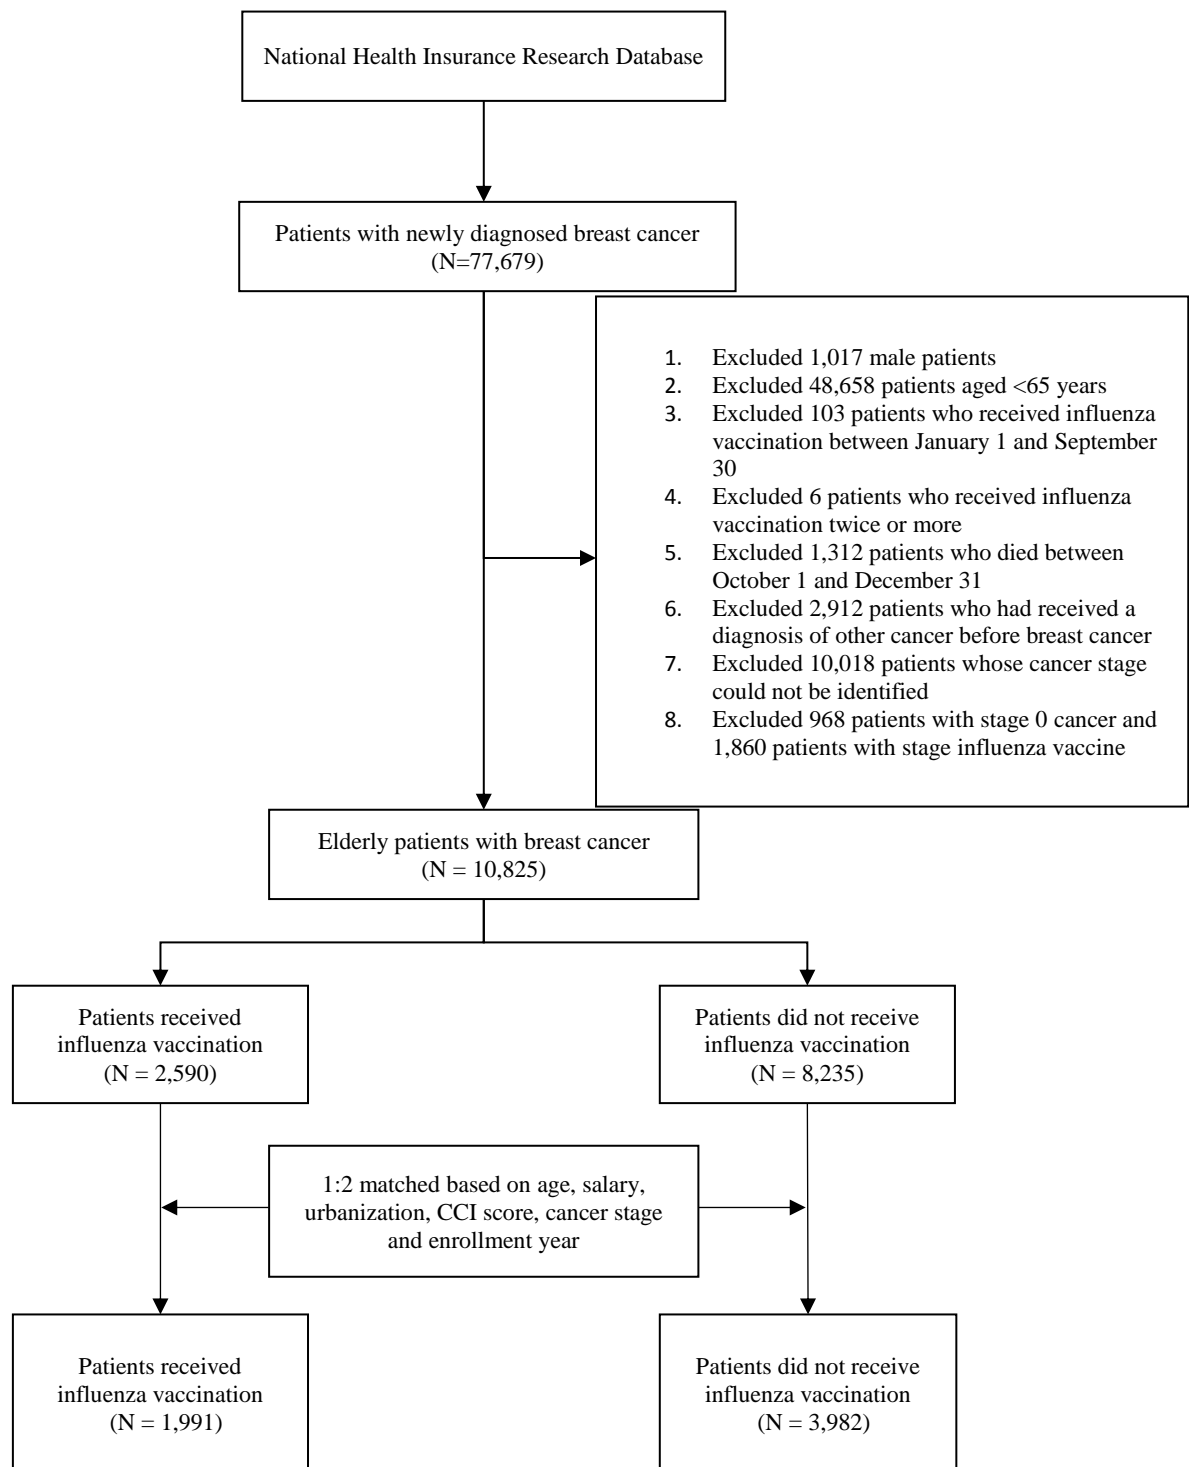

Figure S1. Flowchart of selection of elderly patients with newly diagnosed breast cancer.

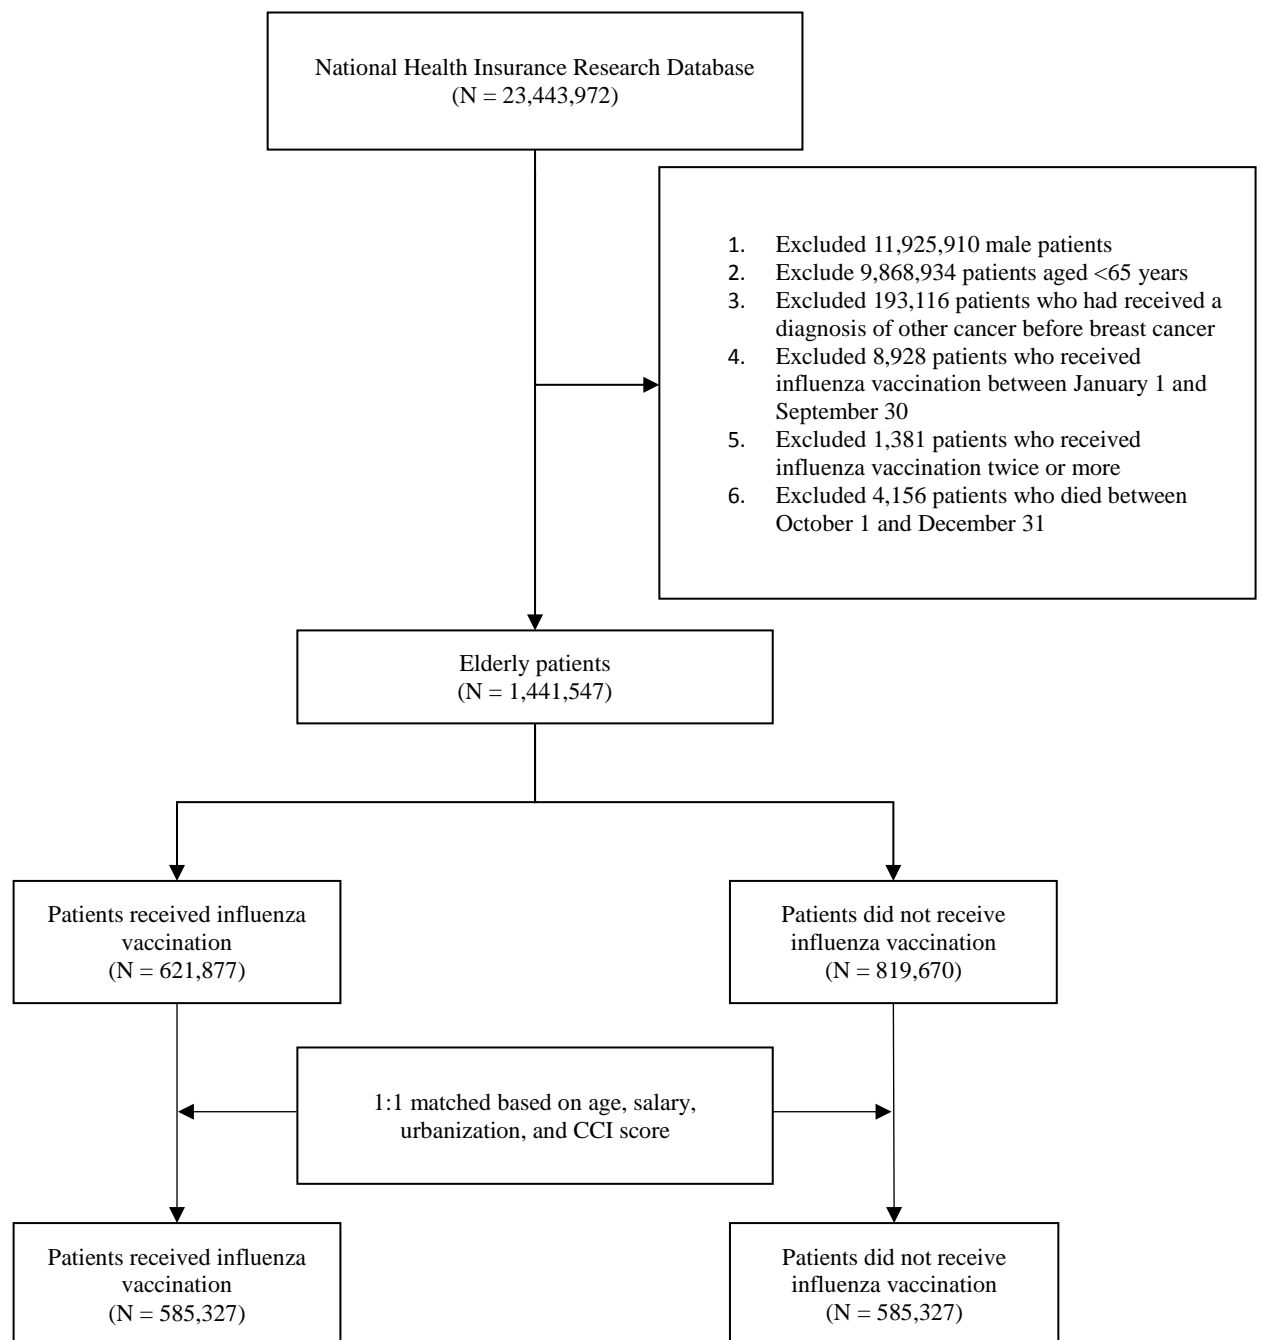

Figure S2. Flowchart of selection of general elderly women
